# Supplementary material for: Micro-Nanoarchitectonics of Electroless Cu/Ni Composite Materials Based on Wood via Heat Treatment
Source: Research Square preprint supplement (doi:10.21203/rs.3.rs-1393984/v1), 2022-02-28
Supplement: Supplementary file 1 [file 0891a9df92d625b86e800299.docx]

**Highlights**

1. The wood-based composites via heat treatment with high electromagnetic shielding were prepared.

2. The contact angle, thickness and conductivity of composite materials can be up to 120.2°, 100.86 μm and 527 S/cm, respectively.

3. The average electromagnetic shielding efficiency can reach 91.40 dB.
